# Supplementary material for: Norepinephrine Inhibits Synovial Adipose Stem Cell Chondrogenesis via α2a-Adrenoceptor-Mediated ERK1/2 Activation
Source: MDPI journal article supplement (doi:10.3390/ijms20133127), 2019-06-26
Supplement: s1 [file s1]

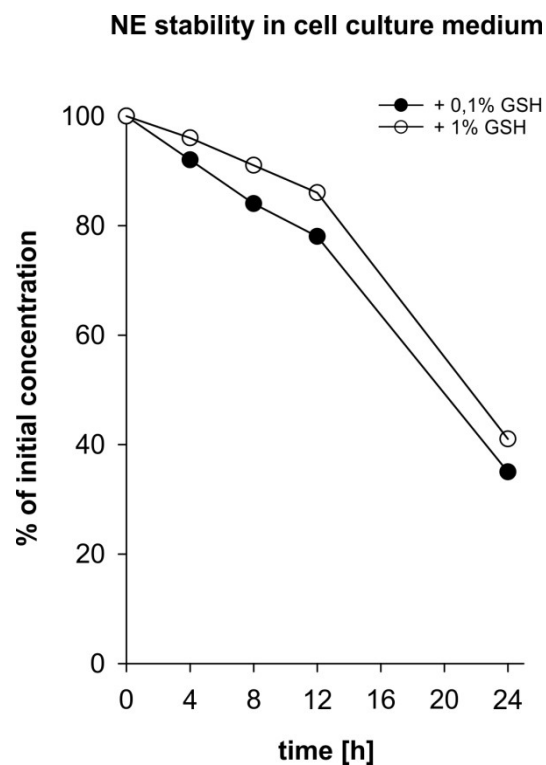

**Figure S1.** Stability of NE in cell culture medium over 24 h in the presence of the antioxidant glutathione (GSH 0.1% or 1%).

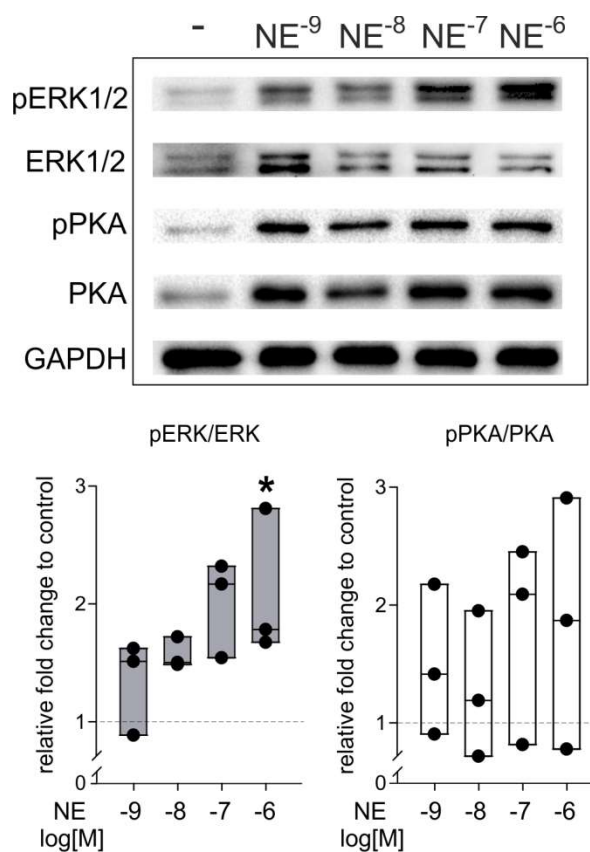

**Figure S2.** NE-mediated intracellular signaling. Expression of ERK1/2 and PKA as well as dose-dependent phosphorylation of ERK1/2 in sASC culture.

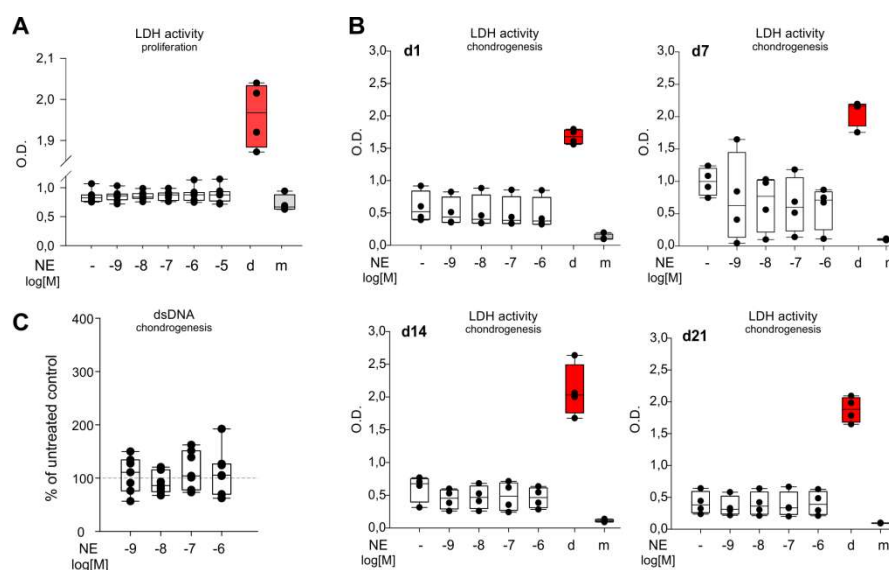

**Figure S3.** Effect of NE on sASC viability and dsDNA content (A) LDH release in monolayer sASCs in the presence of NE in different concentrations (10<sup>-9</sup>–10<sup>-5</sup> M). (B) LDH release in untreated and NE-treated (10<sup>-9</sup>–10<sup>-5</sup> M) three-dimensional chondrogenic pellet culture at day 1, 7, 14 and 21 of differentiation. (C) Biochemical quantification of dsDNA content in untreated and NE-treated (10<sup>-9</sup>–10<sup>-5</sup> M) three-dimensional chondrogenic pellet culture at day 21 of differentiation. Values are shown in percent of untreated control (= 100%, dashed line). Each black circle represents an individual patient. Box plots are explained in legend to Figure 1. Abbreviations: d – dead control (positive control), m – medium (negative control).

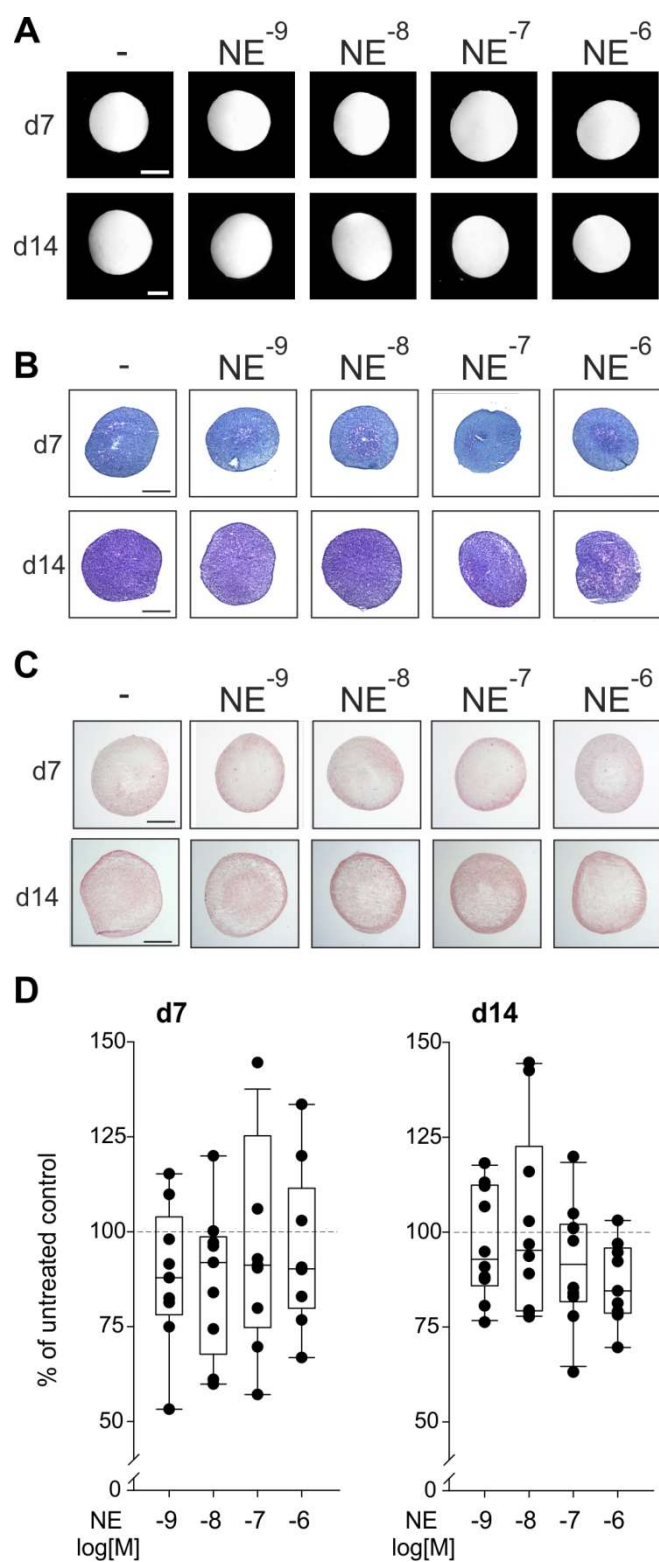

**Figure S4.** Macroscopic, histologic (sGAG) analysis and immunohistochemical type II collagen I staining of untreated or NE-treated (10<sup>-9</sup>-10<sup>-6</sup> M) chondrogenic sASC pellets at d7 and d14 of differentiation (bars, 500  $\mu$ m).

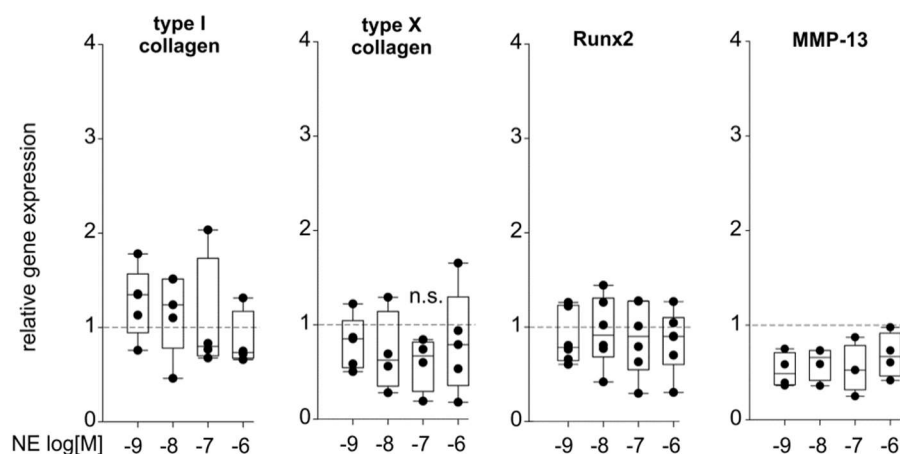

**Figure S5.** Effect of NE on the expression of fibrous cartilage and hypertrophic marker genes during sASC chondrogenesis. (A) Expression of COL1A1, COL10A1, RUNX2, and MMP13 in untreated and NE-treated ( $10^{-9}$ - $10^{-6}$  M) chondrogenic sASC pellets at day 21. Each circle shows the mean of 3 replicates per patient ( $n = 4-6$ ). Values are fold expression of control, where the control = 1 (represented by the dashed line). Box plots are explained in legend to Figure 1.

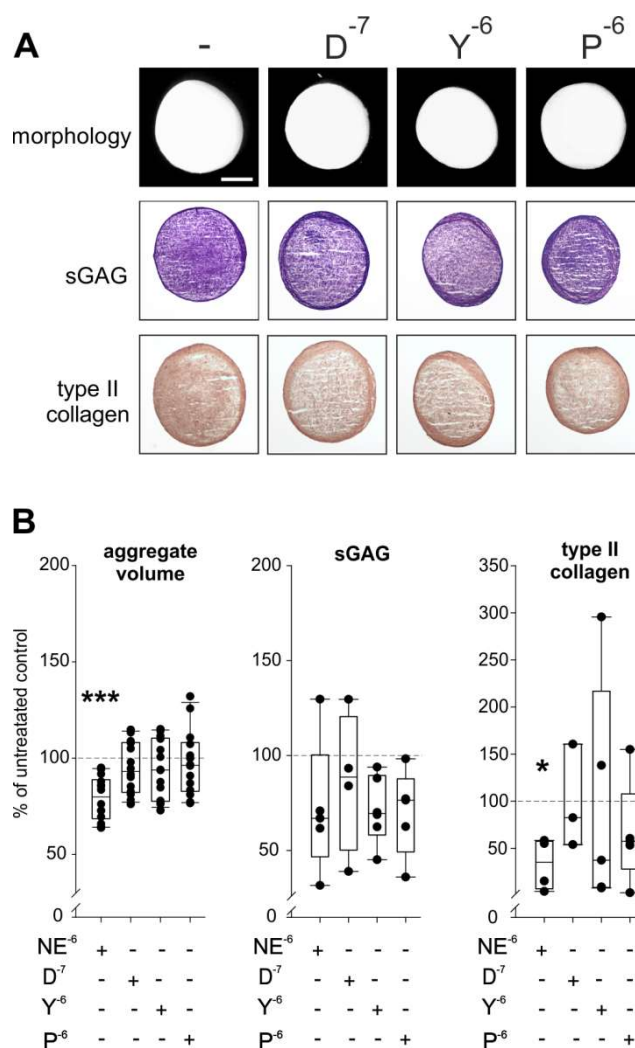

**Figure S6.** Effect of specific AR antagonists during sASC chondrogenesis. (A) Macroscopic, histologic (sGAG) analysis and immunohistochemical type II collagen staining of chondrogenic sASC pellets treated with specific AR antagonists at day 21 of differentiation (bars 500  $\mu$ m). (B) Quantification of pellet volume and biochemical quantification of type II collagen and sGAG content of chondrogenic

sASC pellets treated with specific AR antagonists at day 21. Each circle shows the mean of 3 replicates per patient ( $n = 4-6$ ). Values are the percent of control (control = 100%, dashed line). Box plots are explained in legend to Figure 1. Significant  $p$ -values against untreated control are presented as \*  $p < 0.05$ , \*\*  $p < 0.01$ , \*\*\*  $p < 0.001$ . Abbreviations: D – doxazosin, Y – yohimbine, P – propranolol.

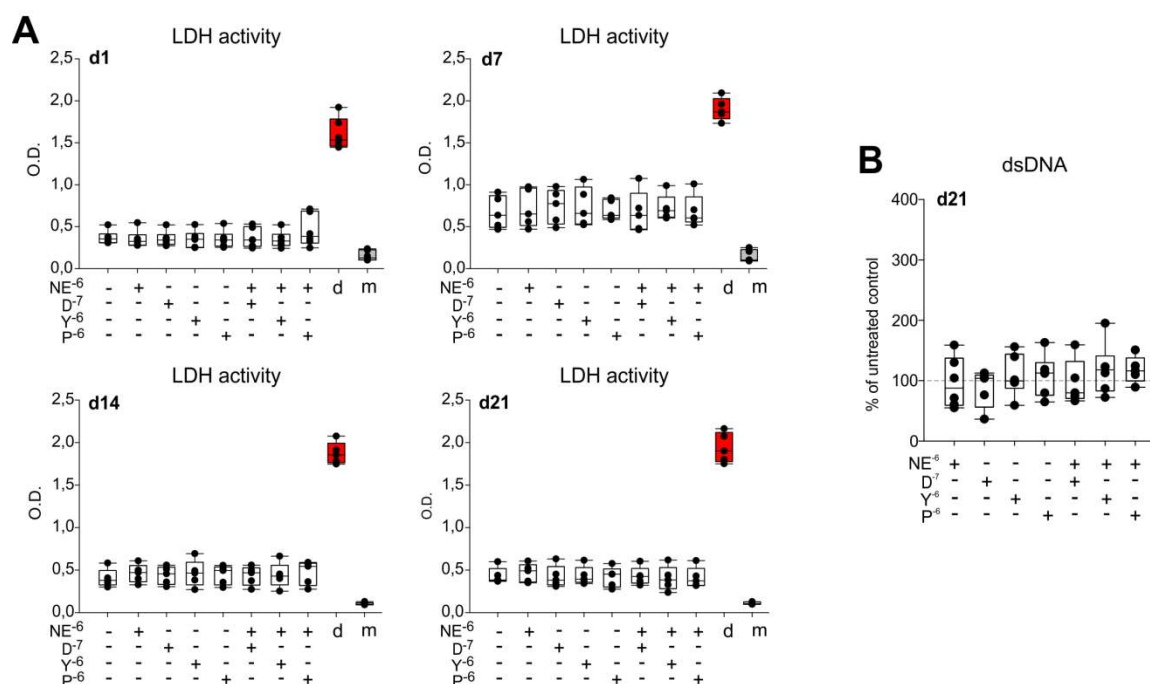

**Figure S7.** Effect of specific antagonists on sASC viability and dsDNA content (A) LDH release in three-dimensional chondrogenic sASC pellets treated with NE (10<sup>-6</sup> M) or with NE plus specific AR antagonists at day 1, 7, 14 and 21 of differentiation. B) Biochemical quantification of dsDNA content in in three-dimensional chondrogenic sASC pellets treated with NE (10<sup>-6</sup> M) or with NE plus specific AR antagonists at day 21 of differentiation. Values are demonstrated in percent of the control (untreated control = 100%, dashed line). Each black circle represents an individual patient. Box plots are explained in legend to Figure 1. Abbreviations: D – doxazosin, Y – yohimbine, P – propranolol, d – dead control (positive control), m – medium (negative control).

**Table S1.** The primer sequences used for PCR.

| Gene Name | NCBI Reference     | Forward (5'-3')       | Reverse (5'-3')       |
|-----------|--------------------|-----------------------|-----------------------|
| GAPDH     | NM_00128974<br>5.2 | CTCCTGTTTCGACAGTCAGCC | TTCCCGTTCTCAGCCTTGAC  |
| TH        | NM_000360.3        | CAGGCAGAGGCCATCATGT   | GTGGTCCAAGTCCAGGTCAG  |
| ADRA1A    | NM_000680.3        | CCATGCTCCAGCCAAGAGTT  | TCCTGTCCTAGACTTCCTCC  |
| ADRA1B    | NM_000679.3        | GTCCACCGTCATCTCCATCG  | GAACAAGGAGCCAAGCGGTAG |
| ADRA1D    | NM_000678.3        | TGACTTTCCGCGATCTCCTG  | TTACCTGCCACGGCCATAAG  |
| ADRA2A    | NM_000681.3        | TGGTCATCGGAGTGTTCTGTG | GCCACTAGGAAGATGGCTC   |
| ADRA2B    | NM_000682.6        | GACATTTACCCGCAACAC    | GGACTGAGAACCAGGAA     |
| ADRA2C    | NM_000683.3        | CGATGTGCTGTTTTGCACCT  | GGATGTACCAGGTCTCGTC   |

|         |                    |                            |                            |
|---------|--------------------|----------------------------|----------------------------|
| ADRB1   | NM_000684.2        | TAGCAGGTGAACTCGAAGC<br>C   | ATCTTCCACTCCGGTCCTCT       |
| ADRB2   | NM_000024.5        | CAGAGCCTGCTGACCAAGA<br>A   | GCCTAACGTCTTGAGGGCT<br>T   |
| ADRB3   | NM_000025.3        | GCCAATTCTGCCTTCAACCC       | GCCAGAGGTTTTCCACAGG<br>T   |
| COL1A1  | NM_000088.3        | ACGTCCTGGTGAAGTTGGTC       | ACCAGGGAAGCCTCTCTCT<br>C   |
| COL2A1  | NM_001844.4        | TTCAGCTATGGAGATGACA<br>ATC | AGAGTCCTAGAGTGACTGA<br>G   |
| MMP13   | NM_002427.4        | GACTGGTAATGGCATCAAG<br>GGA | CACCGGCAAAGCCACTTT<br>A    |
| COL10A1 | XM_011535433<br>.3 | CCCTCTTGTTAGTGCCAACC       | AGATTCCAGTCCTTGGGTC<br>A   |
| RUNX2   | XM_011514966<br>.2 | GGAGTGGACGAGGCAAGAG<br>TTT | AGCTTCTGTCTGTGCCTTCT<br>GG |
| SOX9    | NM_000346.4        | ACACACAGCTCACTCGACC<br>TTG | AGGGAATTCTGGTTGCTCC<br>TCT |

---
